# Supplementary figures and images for: Toward a genome scale sequence specific dynamic model of cell-free protein synthesis in Escherichia coli
Source: PubMed Central journal article supplement — Metab Eng Commun. 2019 Dec 4;10:e00113. doi: 10.1016/j.mec.2019.e00113 (PMC7136494; doi:10.1016/j.mec.2019.e00113), 2019-12-04

**A**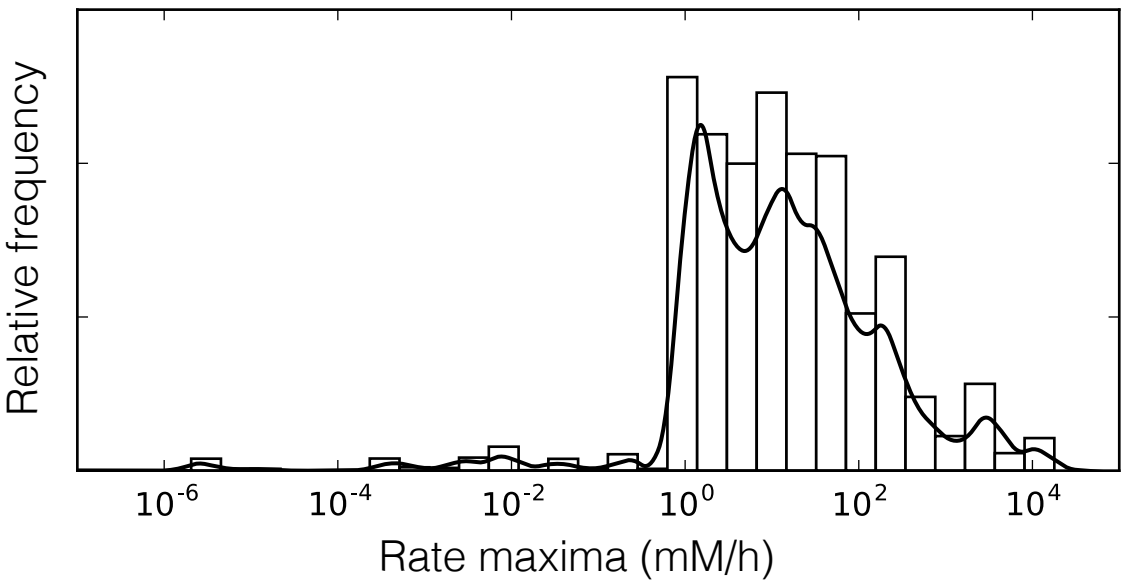**B**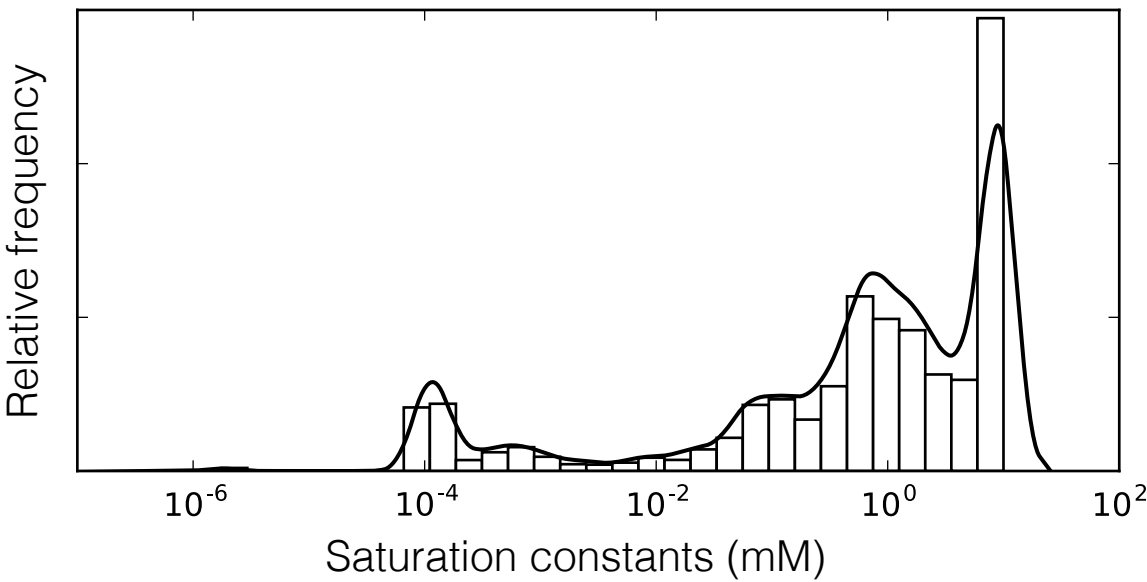

Supplement: mmc1.pdf [file mmc1.pdf]
